# Supplementary material for: Characterizing the Alteration in Rumen Microbiome and Carbohydrate-Active Enzymes Profile with Forage of Muskoxen Rumen through Comparative Metatranscriptomics
Source: MDPI journal article supplement (doi:10.3390/microorganisms10010071), 2021-12-30
Supplement: s1 [file s1]

**Table S1.** Comparison of chemical composition between triticale straw and brome hay (% dry matter)

| Component, %            | Triticale straw | Brome hay   | <i>P</i> value |
|-------------------------|-----------------|-------------|----------------|
| Dry Matter              | 87.8 ± 3.91     | 87.5 ± 2.65 | 0.220          |
| Neutral Detergent Fiber | 83.7 ± 3.49*    | 69.9 ± 0.29 | 0.002          |
| Acid Detergent Fiber    | 52.2 ± 3.66*    | 37.8 ± 0.31 | 0.003          |
| Cellulose               | 43.7 ± 2.73*    | 32.7 ± 0.51 | 0.013          |
| Hemicellulose           | 31.8 ± 1.63     | 31.8 ± 1.63 | 0.170          |
| Lignin                  | 7.4 ± 1.30      | 4.9 ± 0.82  | 0.090          |
| Nitrogen                | 0.67 ± 0.11*    | 1.12 ± 0.10 | 0.001          |

**Table S2.** Summary of sequencing output

| Feeds                            | Animals | Sample ID | Total reads | LSU              |                  | SSU              |                  |
|----------------------------------|---------|-----------|-------------|------------------|------------------|------------------|------------------|
|                                  |         |           |             | Hit Reads number | % of total reads | Hit Reads number | % of total reads |
| 1 <sup>st</sup> triticales straw | Odin    | 777       | 240,614     | 119,883          | 49.82            | 120,725          | 50.17            |
|                                  | Carter  | 789       | 279,030     | 138,232          | 49.54            | 140,797          | 50.46            |
|                                  | Yessey  | 783       | 1,786,228   | 1,059,874        | 59.34            | 725,136          | 40.60            |
|                                  | Willie  | 797       | 375,027     | 188,342          | 50.22            | 186,683          | 49.78            |
| 2 <sup>nd</sup> brome hay        | Odin    | 1,014     | 1,047,269   | 560,762          | 53.55            | 485,745          | 46.38            |
|                                  | Carter  | 1,004     | 85,868      | 41,679           | 48.54            | 44,003           | 51.24            |
|                                  | Yessey  | 1,023     | 637,292     | 275,425          | 43.22            | 360,897          | 56.63            |
|                                  | Willie  | 1,021     | 879,880     | 493,437          | 43.82            | 385,528          | 56.08            |
| 1 <sup>st</sup> brome hay        | Bernie  | 771       | 875,018     | 495,986          | 56.68            | 378,312          | 43.23            |
|                                  | Kobuk   | 791       | 1,241,700   | 501,858          | 40.42            | 737,229          | 59.37            |
|                                  | Tyr     | 780       | 1,899,935   | 1,005,533        | 52.92            | 893,413          | 47.02            |
| 2 <sup>nd</sup> triticales straw | Bernie  | 1,001     | 60,949      | 29,462           | 48.34            | 31,483           | 51.65            |
|                                  | Kobuk   | 1,008     | 366,827     | 178,812          | 48.75            | 188,011          | 51.25            |
|                                  | Tyr     | 1,018     | 1,268,690   | 649,566          | 51.20            | 619,122          | 48.80            |

LSU: Large Subunit rRNA; SSU: Small Subunit rRNA.

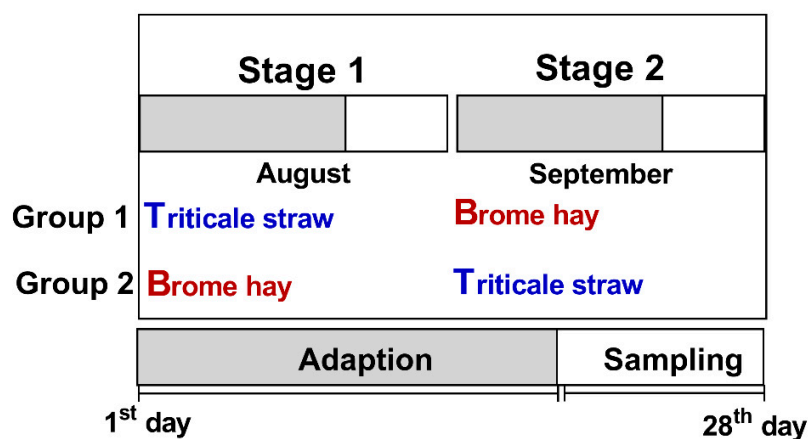

**Figure S1** Schematic presentation of a crossover design, 8 castrated muskoxen with ruminal cannulas were housed in individual pens and assigned into two groups based on their initial body mass ( $268 \pm 18.4$  kg vs.  $278 \pm 27.2$  kg), and ad libitum fed with triticale (*Triticosecale hexaploide*) straw as a low-quality diet or brome (*Bromus spp.*) hay as a medium-quality diet from August to September
